# Supplementary material
Source: publisher site journal article supplement (https://www.spandidos-publications.com/6274/downloadSupplementary)
Supplement: Supplementary file 1 [file downloadSupplementary]

Table SI. Characteristics of the studies on Mincle in pneumonia.

| Author(s),<br>year                 | Animals<br>/cells                                       | Model                                                                                                                        | Infection   | Time after<br>infection                                              | Detection | Detection indicators                     | Results                                                                                           | (Ref.) |
|------------------------------------|---------------------------------------------------------|------------------------------------------------------------------------------------------------------------------------------|-------------|----------------------------------------------------------------------|-----------|------------------------------------------|---------------------------------------------------------------------------------------------------|--------|
| Ishikawa <i>et al</i> , 2009       | WT, Mincle <sup>+/+</sup> , Mincle <sup>-/-</sup> mouse | WT + Emulsion without TDM; WT, Mincle <sup>+/+</sup> , Mincle <sup>-/-</sup> + oil in water emulsion containing TDM (150 µg) | Intravenous | 1 day                                                                | ELISA     | IL-6 and TNF concentrations in the serum | Normal in Mincle <sup>-/-</sup> mice                                                              | (4)    |
|                                    |                                                         |                                                                                                                              |             | 7 days                                                               | -         | LWI                                      |                                                                                                   |        |
|                                    |                                                         |                                                                                                                              |             | 7 days                                                               | PCR       | TNF, IL-1β, MIP-1α mRNA level            |                                                                                                   |        |
|                                    |                                                         |                                                                                                                              |             | 7 days                                                               | -         | Number of lung granulomas                |                                                                                                   |        |
| Behler-Janbeck <i>et al</i> , 2016 | WT mouse                                                | PBS (n=3) vs. <i>S. pneumoniae</i> (1x10 <sup>7</sup> CFU/mouse)                                                             | NR          | 6, 12, 24, 48 and 72 h (n=3 mice per time point and treatment group) | PCR       | Mincle mRNA level in lung                | Mincle gene expression was found to peak in lung tissue of mice at 24 h post <i>S. pneumoniae</i> | (21)   |

|                               |                                                  |                                                      |            |                                                                       |                |                                                                                     |                                                                                                                                                     |
|-------------------------------|--------------------------------------------------|------------------------------------------------------|------------|-----------------------------------------------------------------------|----------------|-------------------------------------------------------------------------------------|-----------------------------------------------------------------------------------------------------------------------------------------------------|
| Sharma <i>et al</i> ,<br>2014 | Female<br>C57BL/6<br>mouse<br>Mincle-/-<br>mouse | WT<br>and<br><i>K. pneumoniae</i> in 20 µl<br>saline | Intranasal | PBS (n=4-6) vs. <i>S. pneumoniae</i> (1x10 <sup>7</sup> NR CFU/mouse) | 24h (n=5)      | Mincle mRNA level in alveolar macrophages and neutrophils purified from lung tissue | challenge                                                                                                                                           |
|                               |                                                  |                                                      |            | 6 h, 1 day, 2 days, 3 days, 5 days (n=6-8)                            | PCR            | Mincle mRNA level in lung                                                           | Protective role of Mincle in host defense against <i>K. pneumoniae</i> pneumonia by (49) coordinating bacterial clearance mechanisms of neutrophils |
|                               |                                                  |                                                      |            | 3 days                                                                | Lung pathology | -                                                                                   | -                                                                                                                                                   |
|                               |                                                  |                                                      |            |                                                                       | Flow cytometry | Mincle level in infiltrating lung cells                                             | Mincle was highly expressed on neutrophils                                                                                                          |

|                               |                                                                                                      |                                                        |    |                                     |                |                            |                                                                                                                          |      |
|-------------------------------|------------------------------------------------------------------------------------------------------|--------------------------------------------------------|----|-------------------------------------|----------------|----------------------------|--------------------------------------------------------------------------------------------------------------------------|------|
|                               |                                                                                                      |                                                        |    | 2 weeks<br>(n=15)                   | N/A            | Survival                   | Mincle <sup>-/-</sup> mice all succumbed to infection by day 6 after infection                                           |      |
| Rabes <i>et al</i> , 2015     | AECs, MVECs and AMΦs were isolated from the lung; PMNs and BMMs from the bone marrow of C57Bl/6 mice | PBS vs. <i>S. pneumoniae</i> ST2                       | NR | NR                                  | PCR            | Mincle mRNA level          | Mincle expression is low in AECs and LMVECs, but higher in AMΦs, BMMs and neutrophils                                    | (51) |
| Hollwedel <i>et al</i> , 2020 | C57BL/6J WT mouse<br><br>C57BL/6J Mincle tg mouse                                                    | 19F <i>S. pneumoniae</i> (5x10 <sup>6</sup> CFU/mouse) | NR | 6, 24 and 48 h (n=4 per time point) | Flow cytometry | Mincle level in BAL fluids | Mincle expression was significantly upregulated at 6 h post-infection, peaking at 24 h post-infection in Mincle tg group | (50) |

|                          |                                                        |                  |       |                                                                                          |                                                                               |
|--------------------------|--------------------------------------------------------|------------------|-------|------------------------------------------------------------------------------------------|-------------------------------------------------------------------------------|
| C57BL/6J WT mouse        |                                                        | 6 and 24 h (n=4) | ELISA | TNF- $\alpha$ , IL-1 $\beta$ , IL-6, MIP-2, and CCL-2 level in BAL fluid and lung tissue | Upregulated in Mincle tg group                                                |
|                          | 19F <i>S. pneumoniae</i> (1x10 <sup>7</sup> CFU/mouse) |                  |       |                                                                                          |                                                                               |
|                          | NR                                                     |                  |       |                                                                                          |                                                                               |
| C57BL/6J Mincle tg mouse |                                                        | 4 days (n=4)     | H&E   | Degree of inflamed lung tissue                                                           | On day 4 post-infection, Mincle tg mice developed septic lobar pneumonia.     |
|                          |                                                        | 10 days (n=4)    | -     | Survival                                                                                 | Increased mortality with early onset (day 3 post-infection) in Mincle tg mice |

---

WT, wild-type; Mincle, macrophage-inducible C-type lectin receptor; tg, transgenic; TDM, trehalose-6,6'-dimycolate; IL, interleukin; TNF, tumor necrosis factor; LWI, lung weight index; MIP-1 $\alpha$ , macrophage inflammatory protein-1 $\alpha$ ; CFU, colony-forming units; AECs, alveolar epithelial cells; MVECs, microvascular endothelial cells; AM $\Phi$ s, alveolar macrophages; PMNS, polymorphonuclear neutrophils BMMs, bone-marrow macrophages; BMDCs, bone marrow-derived dendritic cells; BAL, bronchoalveolar lavage; MIP-2, macrophage inflammatory protein-2; CCL-2, chemokine (C-C motif) ligand 2; H&E, hematoxylin and eosin; NR, not reported; NA, not applicable.

---
